# Supplementary material for: Early Adoption of Longitudinal Surveillance for SARS-CoV-2 among Staff in Long-Term Care Facilities: Prevalence, Virologic and Sequence Analysis
Source: PubMed Central journal article supplement (PMC8579921; doi:10.1128/spectrum.01003-21), 2021-11-10
Supplement: spectrum01003-21_supp_1_seq9.pdf [file spectrum01003-21_supp_1_seq9.pdf]

1 **Supplemental Legends**

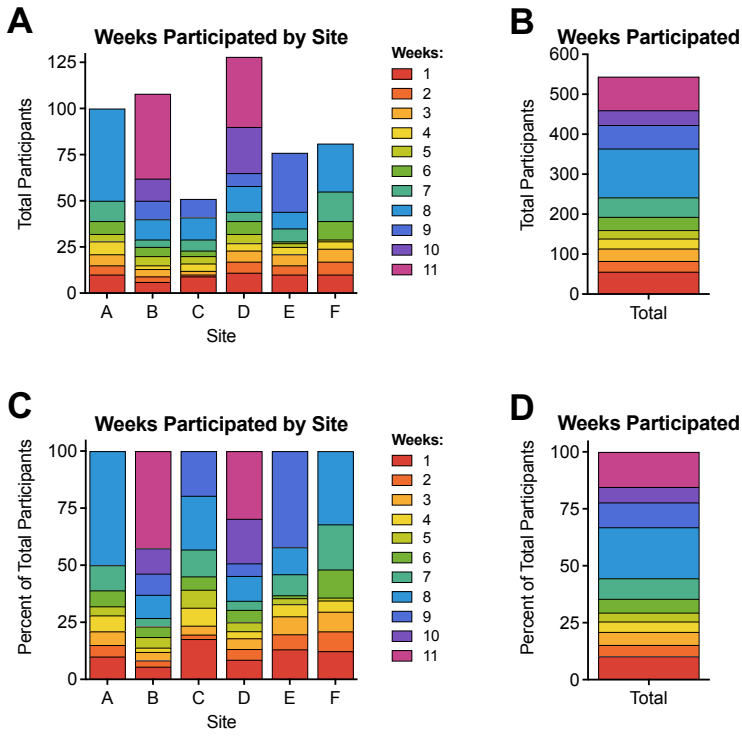

2

3 **Supplemental Figure 1.** Staff participation by week. The number of weeks each staff member  
4 participated in testing **A)** by individual site and **B)** in total. The percentage of staff **C)** at each site and **D)**  
5 in total that participated by number of weeks.

6

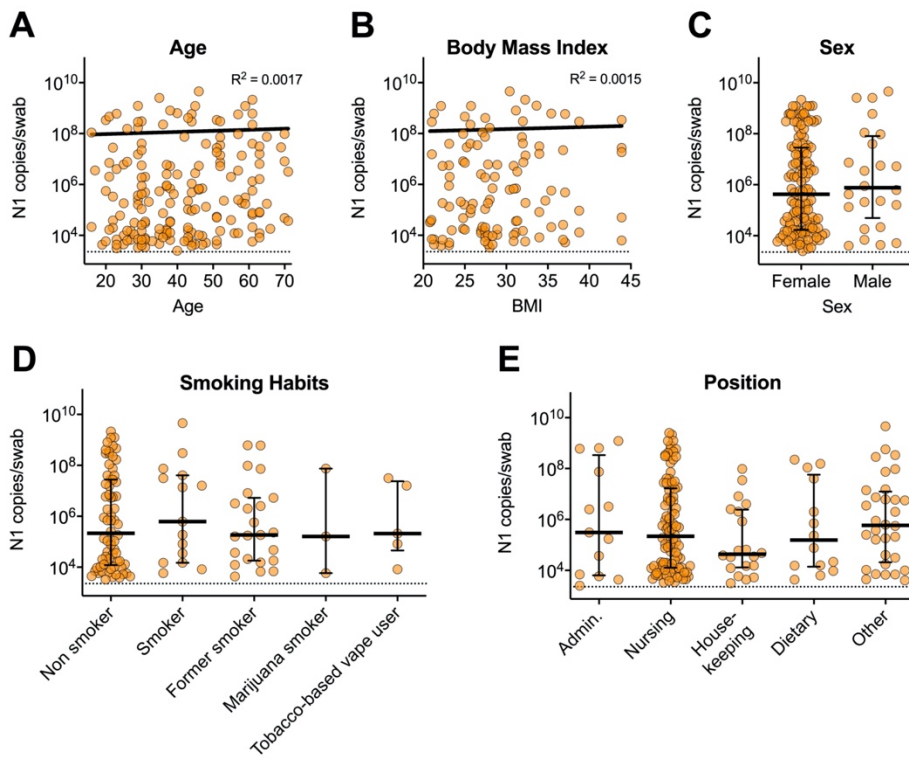

7

8 **Supplemental Figure 2.** Virus levels stratified by participant age, body mass index, sex, and job code.  
 9 Participants were stratified by **A)** age (n = 91), **B)** BMI (n = 51), **C)** sex (n = 79), **D)** smoking habits, and  
 10 **E)** job code (n = 90). N1 vRNA from all N1-positive samples were plotted. **A and B)** Semilog nonlinear  
 11 regression line fit, and **C-D)** bar and errors represent median with interquartile range. Dashed line  
 12 represents limit of detection.

13

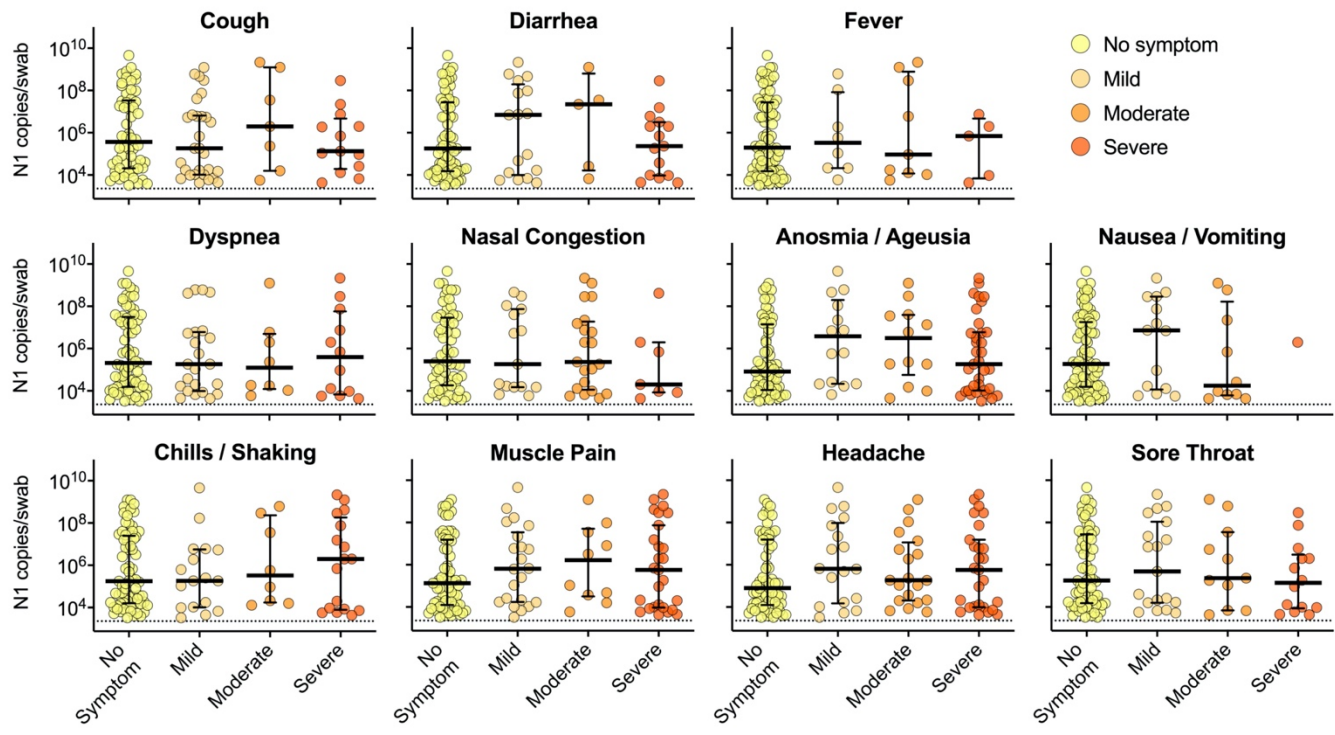

14

15 **Supplemental Figure 3.** N1 vRNA and symptom severity. N1 vRNA levels for each symptom stratified  
 16 by symptom severity. Bar and errors represent median with interquartile range. Dashed line represents  
 17 limit of detection.
